# Supplementary material for: Luminescent carbon dots versus quantum dots and gold nanoclusters as sensors
Source: Royal Society of Chemistry journal article supplement (doi:10.1039/d4nh00107a), 2024-01-01
Supplement: d4nh00107a1.pdf [file d4nh00107a1.pdf]

## Electronic Supplementary Information

### **Luminescent ultra-small nanoparticles in chemical and biological sensing**

J. S. Anjali Devi\*<sup>a,b,c</sup>, S. Madanan Anju<sup>a</sup>, G. M. Lekha<sup>a</sup>, R. S. Aparna<sup>a</sup>, Sony George\*<sup>a</sup>

<sup>a</sup> Department of Chemistry, School of Physical and Mathematical Sciences, University of Kerala, Thiruvananthapuram 695581, Kerala, India.

<sup>b</sup> School of Chemical Sciences, Mahatma Gandhi University, Priyadarsini Hills P. O., Kottayam 686560, Kerala, India.

<sup>c</sup> Department of Chemistry, Kannur University, Swami Anandatheertha Campus, Payyanur, Edat P. O. Kannur 670327, Kerala, India.

\*Email: [anjalidevijs@kannuruniv.ac.in](mailto:anjalidevijs@kannuruniv.ac.in) ; [anjalidevijs@gmail.com](mailto:anjalidevijs@gmail.com) (JSA);

[emailtosony@gmail.com](mailto:emailtosony@gmail.com) (SG)

Tel.: +91 8547481911 (JSA); +91 9446462933 (SG)

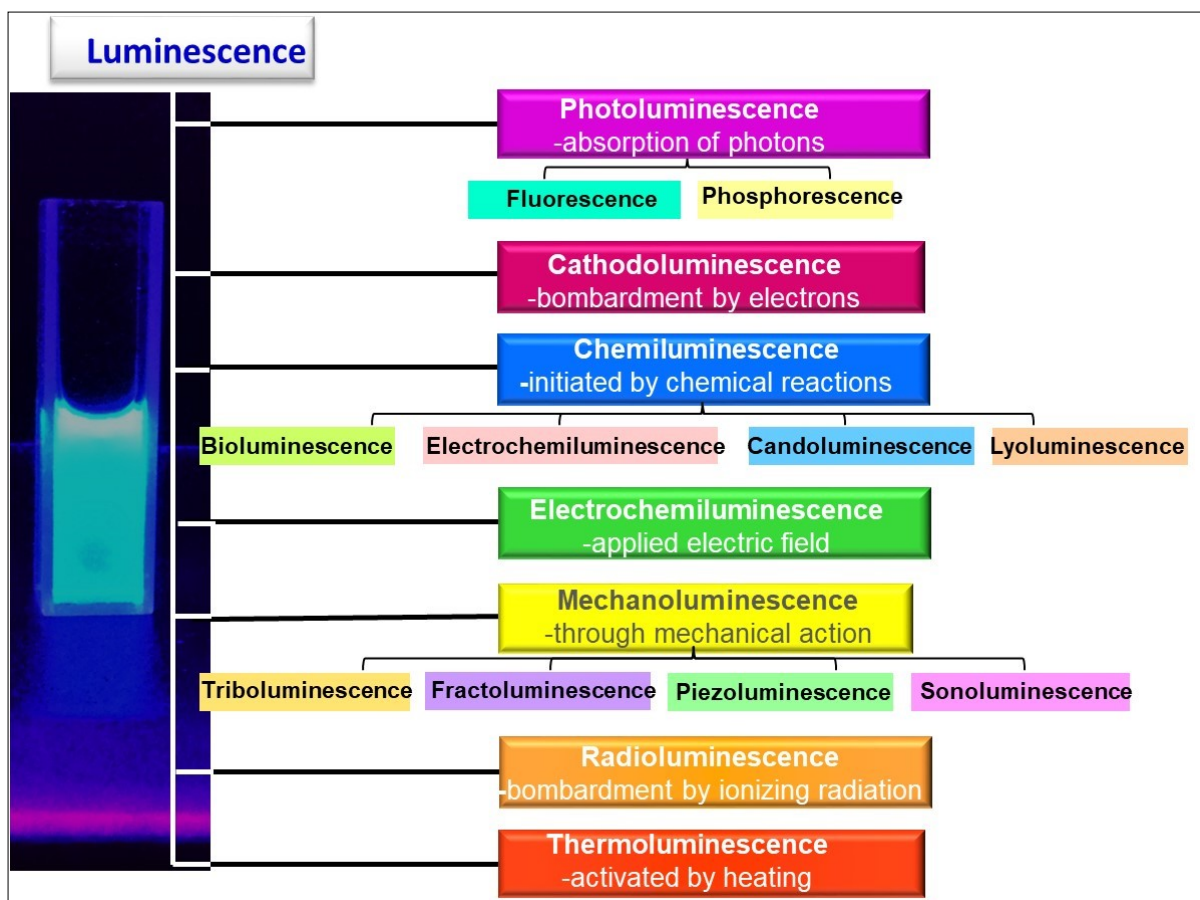

**Figure S1.** Scheme illustrating different types of luminescence and eliciting energy sources.

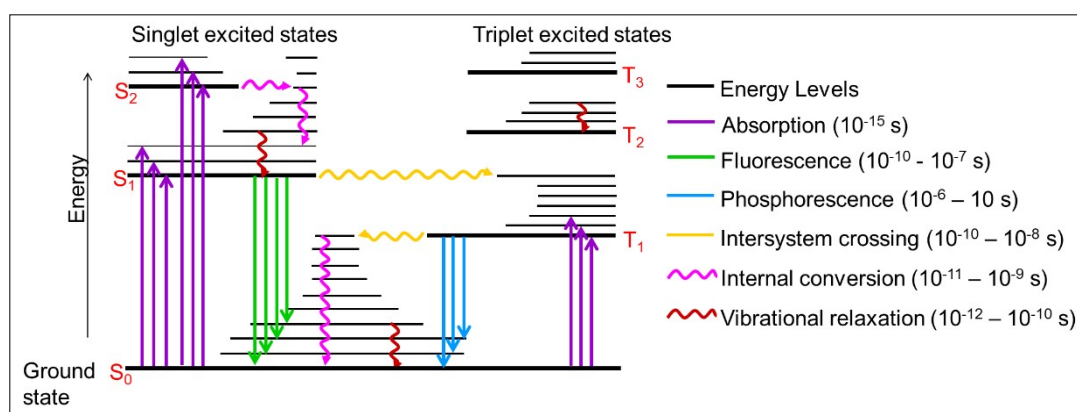

**Figure S2.** Jablonski diagram showing radiative and nonradiative electronic transitions within the fluorescent organic molecule upon excitation by photons.
